# Supplementary material for: PAXX promotes KU accumulation at DNA breaks and is essential for end-joining in XLF-deficient mice
Source: PubMed Central journal article supplement (PMC5216128; doi:10.1038/ncomms13816), 2017-01-04
Supplement: ncomms13816-s1.pdf [file ncomms13816-s1.pdf]

**A.**

|                           | Weight (gram) |           | Count (10 <sup>6</sup> ) |         |
|---------------------------|---------------|-----------|--------------------------|---------|
|                           | Thymus        | Spleen    | Thymus                   | Spleen  |
| WT (n=3)                  | 0.08±0.02     | 0.08±0.03 | 67.3±12                  | 44.6±18 |
| PAXX <sup>-/-</sup> (n=4) | 0.07±0.03     | 0.09±0.02 | 67.7±18                  | 37.1±10 |

**B.**

| x10 <sup>6</sup>          | Thymus  |         |          |         |         |
|---------------------------|---------|---------|----------|---------|---------|
|                           | Total   | DN      | DP       | CD4 SP  | CD8 SP  |
| WT (n=3)                  | 67.3±12 | 1.8±1.2 | 54.2±7.0 | 8.7±2.2 | 2.5±1.2 |
| PAXX <sup>-/-</sup> (n=4) | 67.7±18 | 2.1±1.0 | 55.3±6.5 | 7.7±2.3 | 2.6±1.5 |

**C.**

|                           | Bone Marrow |           |               |               |
|---------------------------|-------------|-----------|---------------|---------------|
|                           | Pro-B%      | Pre-B%    | Pre/Pro Ratio | IgM+ B cells% |
| WT (n=3)                  | 2.24±1.08   | 13.2±2.53 | 5.05±1.05     | 11.1±2.8      |
| PAXX <sup>-/-</sup> (n=4) | 2.27±1.05   | 14.5±3.28 | 6.38±1.58     | 10.8±3.7      |

**D.**

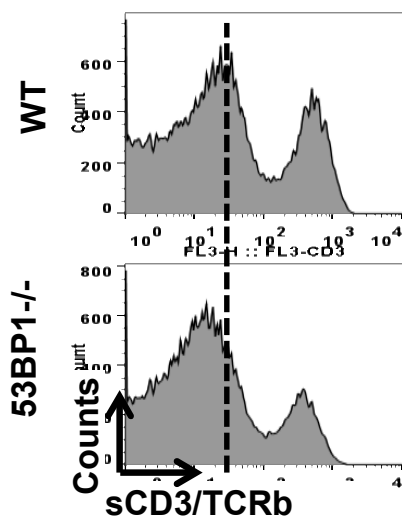

**Supplementary Fig. 1** *Paxx*<sup>-/-</sup> mice have normal lymphocyte development.

(A) The weight and total cellularity of the thymus and spleen from *Paxx*<sup>+/+</sup> and *Paxx*<sup>-/-</sup> mice. At least three mice at ~7 weeks of age for each genotype were analyzed and were used to calculate the average and standard deviations. (B) Total thymocyte counts and calculated CD4<sup>-</sup>CD8<sup>-</sup> double negative (DN), CD4<sup>+</sup>CD8<sup>+</sup> double positive (DP) thymocyte and single positive (SP) T cell numbers in the thymus. Each value represents the average ± standard deviation from at least three mice of ~7 weeks of age for each genotype. (C) The percentage of pro-B (B220<sup>+</sup>IgM<sup>-</sup>CD43<sup>+</sup>), pre-B (B220<sup>+</sup>IgM<sup>-</sup>CD43<sup>-</sup>) and mature B (B220<sup>+</sup>IgM<sup>+</sup>CD43<sup>-</sup>) cells in total bone marrow from different genotypes. Pre/Pro Ratio was calculated from each mouse. Each value represents the average ± standard deviation from at least three mice of ~7 weeks of age for each genotype. (D) Surface CD3/TCRβ expression in thymocytes from representative *53BP1*<sup>+/+</sup> (WT) and *53BP1*<sup>-/-</sup> mice. The vertical line marks the median of the surface CD3/TCRβ levels in WT thymocytes.

**A.**

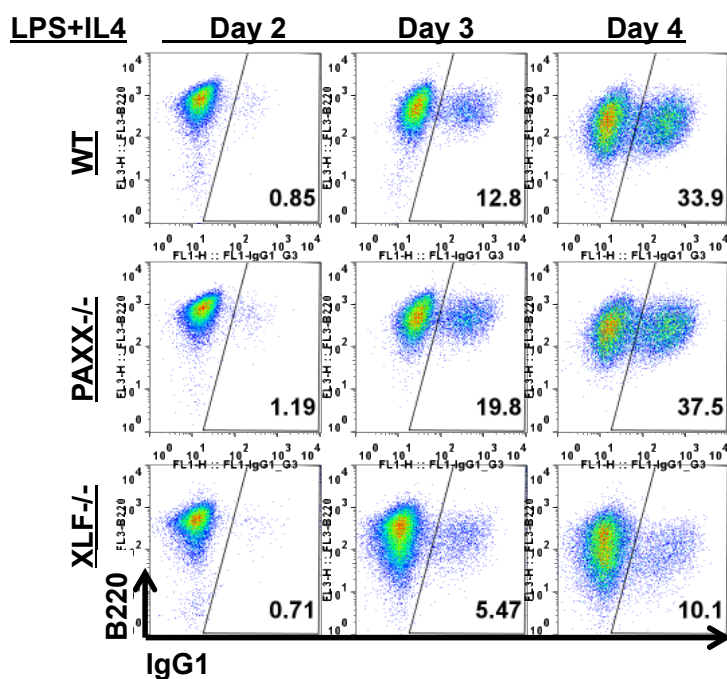

**B.**

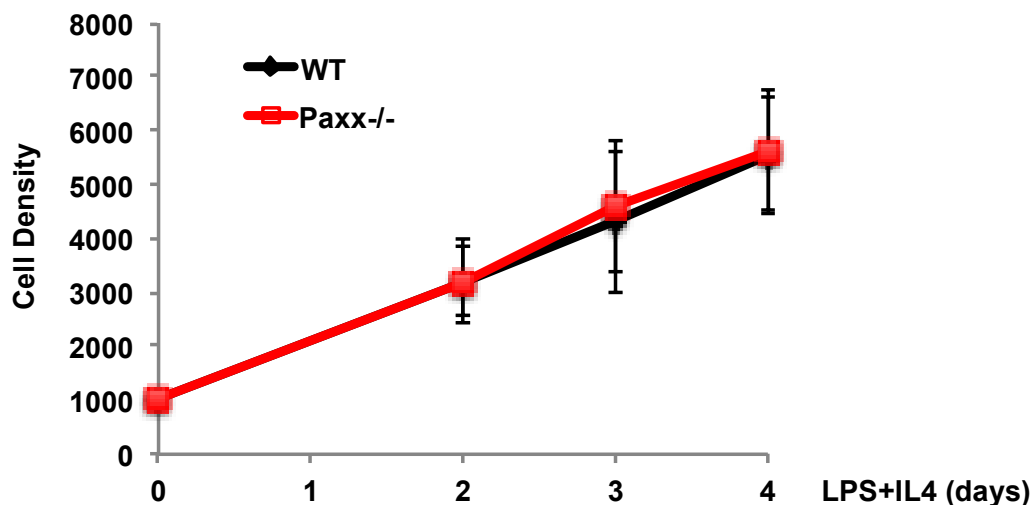

**Supplementary Fig. 2 Class switching recombination is normal in *Paxx*<sup>-/-</sup> mice**

(A) Representative flow cytometry analyses of LPS/IL4 stimulated CD43<sup>-</sup> splenocytes derived from *Paxx*<sup>+/+</sup> (WT), *Paxx*<sup>-/-</sup> and *Xlf*<sup>-/-</sup> mice at 2, 3 and 4 days after stimulation. (B) Proliferation of stimulated *Paxx*<sup>+/+</sup> (WT) or *Paxx*<sup>-/-</sup> B cells. The Y-axis indicates the cell density per  $\mu$ l. Cell number was counted using standard hemocytometer.

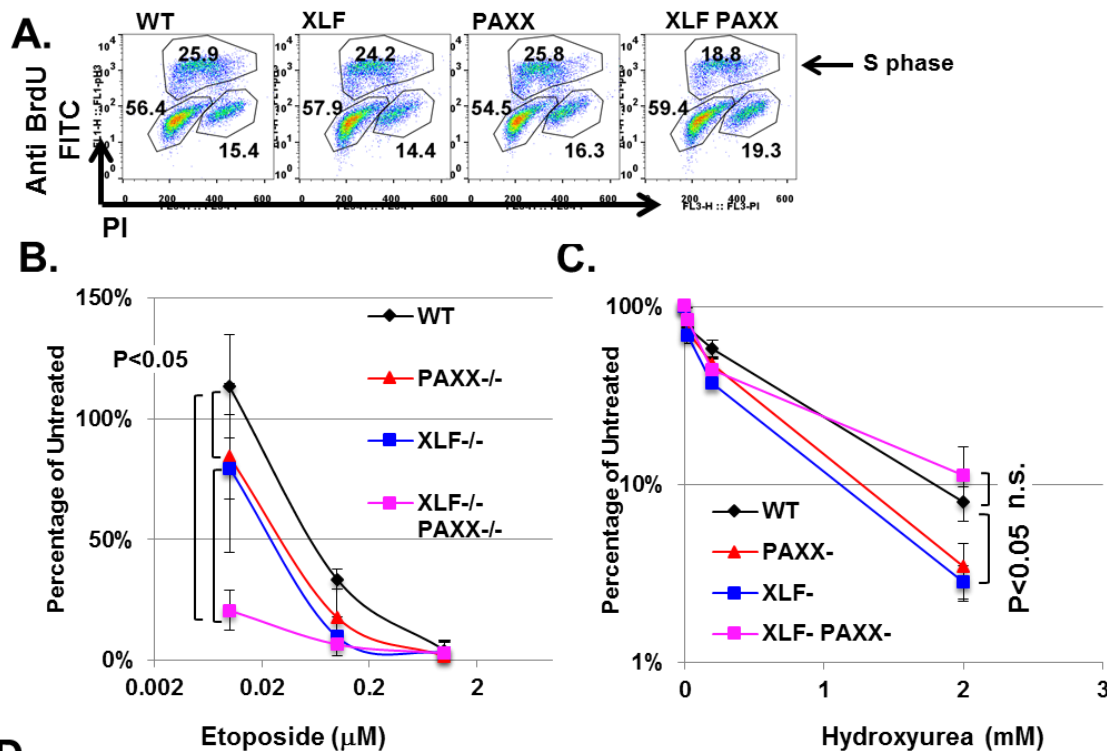

**D.**

|                                        | Total # MP | # abn. MP | % abn. MP    | Total # abn. | Brks/MP | Csm. Brk | Csm. Brk/MP | Ctd. Brk | Ctd. Brk/MP |
|----------------------------------------|------------|-----------|--------------|--------------|---------|----------|-------------|----------|-------------|
| WT                                     | 144        | 3         | 2.04%±0.13%  | 3            | 0.020   | 2        | 0.015       | 1        | 0.005       |
| XLF <sup>-/-</sup>                     | 187        | 18        | 9.63%±0.01%  | 18           | 0.096   | 15       | 0.080       | 3        | 0.016       |
| PAXX <sup>-/-</sup>                    | 144        | 5         | 3.44%±0.33%  | 5            | 0.035   | 4        | 0.028       | 1        | 0.007       |
| XLF <sup>-/-</sup> PAXX <sup>-/-</sup> | 206        | 41        | 18.89%±2.60% | 47           | 0.228   | 42       | 0.196       | 5        | 0.025       |

**E.**

|                                        | Total # MP | # abn. MP | % abn. MP    | Total # abn. | Brks/M P | Csm. Brk | Csm. Brk/MP | Ctd. Brk | Ctd. Brk/MP |
|----------------------------------------|------------|-----------|--------------|--------------|----------|----------|-------------|----------|-------------|
| WT                                     | 151        | 8         | 5.28%±0.56%  | 8            | 0.053    | 7        | 0.046       | 1        | 0.007       |
| XLF <sup>-/-</sup>                     | 150        | 15        | 10.00%±1.15% | 16           | 0.107    | 13       | 0.087       | 3        | 0.020       |
| XLF <sup>-/-</sup> PAXX <sup>-/-</sup> | 169        | 22        | 13.02%±2.01% | 24           | 0.142    | 18       | 0.137       | 2        | 0.005       |

**Supplementary Fig. 3 Increased genomic instability in *Xlf<sup>-/-</sup>Paxx<sup>-/-</sup>* MEF cells and v-abl transformed pre-B cells** (A) Cell cycle distribution of the indicated P1 primary MEF cells. P1 MEFs were incubated with BrdU for 30 min before collected for PI and FITC anti-BrdU staining. (B) Etoposide or (C) Hydroxyurea (HU) sensitivity assay in P1 primary MEF cells. Student's t test was used to compare the percentage of survival between different groups. n.s. not significant. The percentage (D) and (E) Summary of cytogenetic abnormalities in WT, *Xlf<sup>-/-</sup>*, *Paxx<sup>-/-</sup>* and *Xlf<sup>-/-</sup>Paxx<sup>-/-</sup>* primary MEF cells (P1) and v-abl transformed pre-B cells. Abbreviations: MP- metaphase, Abn- Abnormal, Csm- Chromosomal, Ctd- Chromatid, Brk- Break. The data summarizes the results from two or more independent experiments using at least two independently derived cell lines of each genotype. All images were obtained and processed with Metafer (Metasystem Inc).

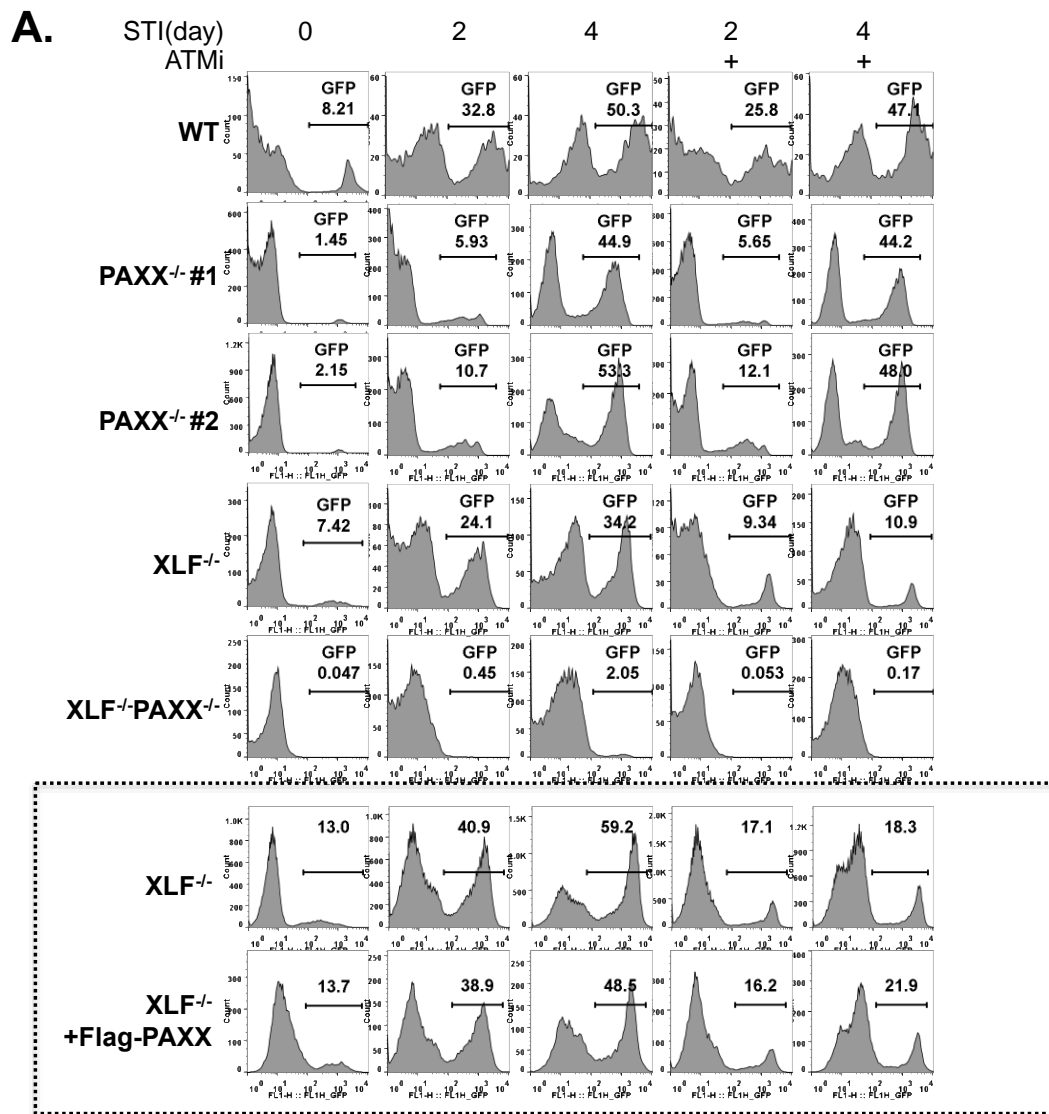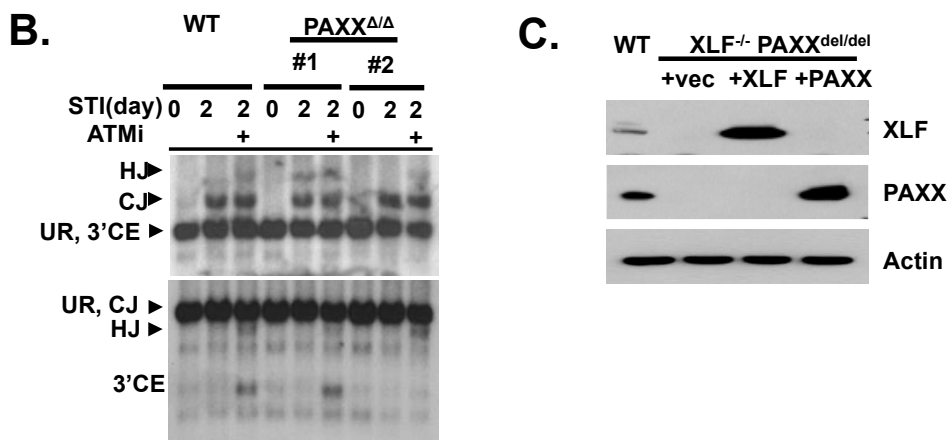

**Supplementary Fig. 4 *Xlf* and *Paxx* double deficiency abrogated chromosomal V(D)J recombination**  
 (A) Flow cytometry analyses for GFP+ cells after STI571 treatment (3 $\mu$ M) (with or without ATM inhibitor, KU55933, 15  $\mu$ M, added 1hr before STI571) of WT, two independent *Paxx* <sup>$\Delta/\Delta$</sup>  clones, *Xlf*<sup>-/-</sup> and *Xlf*<sup>-/-</sup> *Paxx* <sup>$\Delta/\Delta$</sup>  cells. In parallel (lower two rows), another *Xlf*<sup>-/-</sup> cells with or without ectopic overexpression of PAXX were also treated with STI571 in the presence or the absence of ATM kinase inhibitor. Gated hCD4+ cells were plotted in the histogram. (B) Southern blot analyses of the V(D)J recombination substrates, intermediates and products of representative *Paxx*<sup>+/+</sup> (WT) and *Paxx* <sup>$\Delta/\Delta$</sup>  cells with or without ATM kinase inhibitor (KU55933, 15  $\mu$ M, added 1hr before STI571 at 3 $\mu$ M). See Fig.6A for the location for probes and digestion sites. (C) Western blot for XLF, Flag-PAXX and  $\beta$ -actin in WT and *Xlf*<sup>-/-</sup> *Paxx* <sup>$\Delta/\Delta$</sup>  cells with or without ectopic expression of XLF or PAXX.



**Fig 5B**

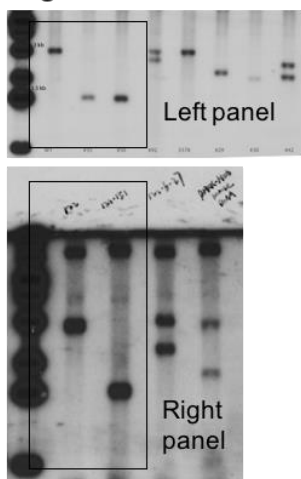

**Fig 5C**

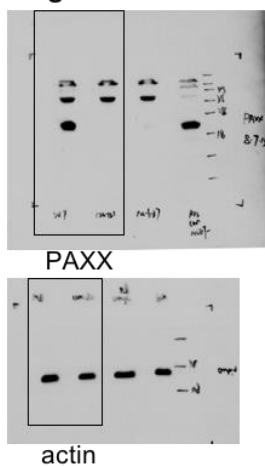

**Fig 6B**

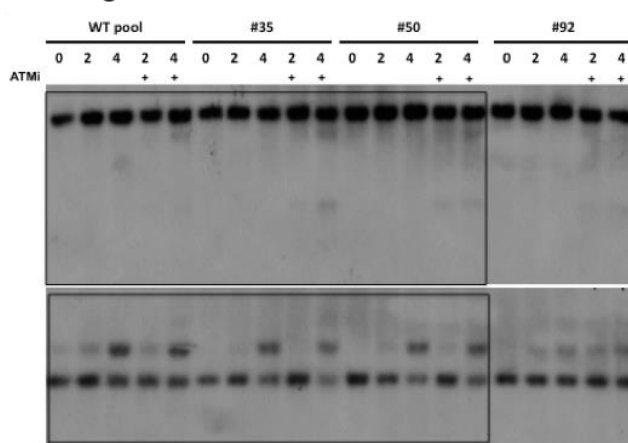

**Fig 6C hCD4 probe**

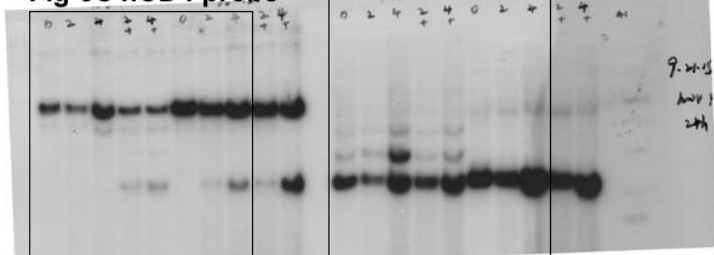

**Fig 6C GFP probe**

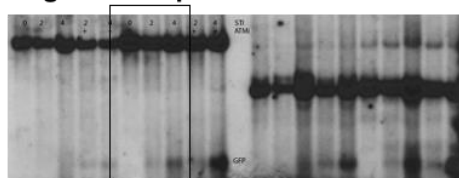

**Fig 6D**

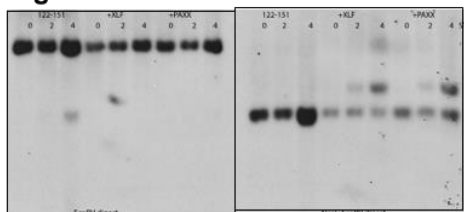

**Fig 6E**

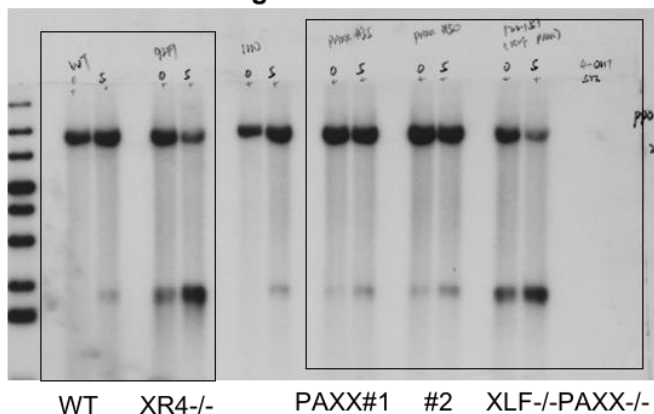

**Fig 7A**

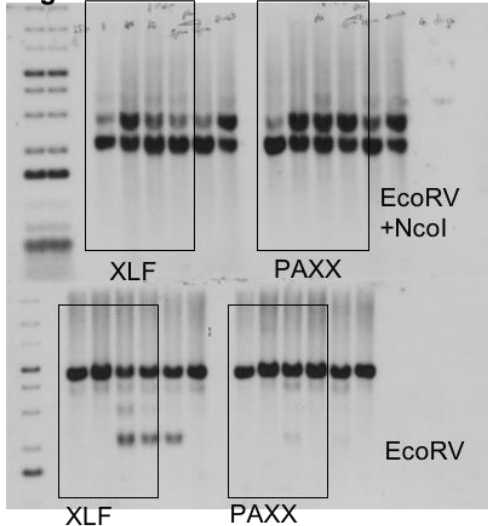

**Fig 7B**

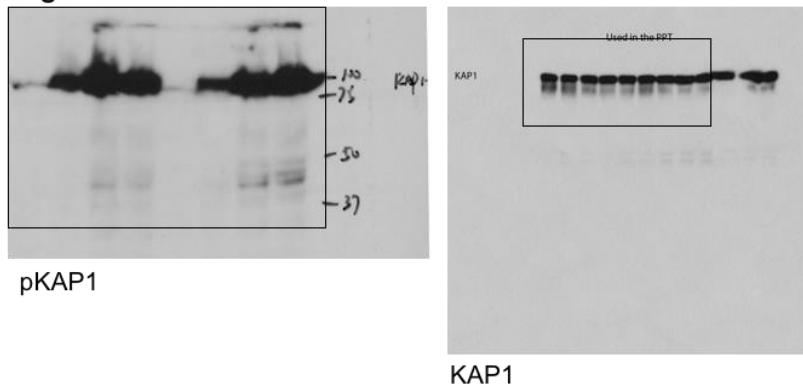

**Supplementary Fig. 6 Original images of Southern blots and Western blots.**

Fig 5B, 6B, 6C, 6D, 6E and 7A are original images of Southern blots hybridized with probes mentioned in paper. Fig 5C and 7B are original images of Western blots.

**Supplementary Table 1 Endogenous V(D)J recombination junction at Vβ14-Dβ-Jβ1.1/2 from WT or Paxx<sup>-/-</sup> thymocytes. P:**

Palindromic elements, N: non-template nucleotide addition. The total number of nucleotide deletion from V-D or Paxx<sup>-/-</sup> thymocytes were calculated and listed on the right.

| Vβ14                       | P | N     | P  | Db1          | P | N      | P  | Jb1.1 or Jb 1.2                      | VD del (nt) | DJ del (nt) |
|----------------------------|---|-------|----|--------------|---|--------|----|--------------------------------------|-------------|-------------|
| Paxx+/+                    |   |       |    |              |   |        |    | Jb1.1 (NTEVFFGKGR)                   |             |             |
| TGGCTTACCTCTGTGCCCTGGAGTCT |   |       |    | GGGACAGGGGGC |   |        |    | CAACACAGAAGTCTTCTTTGGTAAAGGAACCAGACT |             |             |
| TGGCTTACCTCTGTGCCCTGGAGTC  | C |       | C  | GGGACAGGG    | C |        |    | ACACAGAAGTCTTCTTTGGTAAAGGAACCAGACT   | 1           | 6           |
| TGGCTTACCTCTGTGCCCTGGGA    |   |       | C  | AC           | G | ACGG   | TG | CAACACAGAAGTCTTCTTTGGTAAAGGAACCAGACT | 7           | 7           |
| TGGCTTACCTCTGTGCCCTGGAGTCT |   |       | C  | GGGGG        |   |        |    | AAACACAGAAGTCTTCTTTGGTAAAGGAACCAGACT | 6           | 2           |
| TGGCTTACCTCTGTGCCCTGGAGTCT | A | ATG   |    | GGGGG        |   | A      |    | ACAGAAGTCTTCTTTGGTAAAGGAACCAGACT     | 6           | 5           |
| TGGCTTACCTCTGTGCCCTGGAGTCT |   |       |    | AGG          | C | AG     |    | AAACACAGAAGTCTTCTTTGGTAAAGGAACCAGACT | 5           | 5           |
| TGGCTTACCTCTGTGCCCTGGAGTCT |   |       |    | AC           | G |        |    | ACAGAAGTCTTCTTTGGTAAAGGAACCAGACT     | 10          | 12          |
| TGGCTTACCTCTGTGCCCTGGAGTC  |   | A     |    | GACAGGGG     | C | GG     |    | ACACAGAAGTCTTCTTTGGTAAAGGAACCAGACT   | 3           | 5           |
| TGGCTTACCTCTGTGCCCTGGAGTCT |   |       |    | ACAGGGG      |   |        |    | ACACAGAAGTCTTCTTTGGTAAAGGAACCAGACT   | 3           | 5           |
| TGGCTTACCTCTGTGCCCTGGAGTCT |   | GA    |    | GGACAGGGGG   |   | G      |    | ACAGAAGTCTTCTTTGGTAAAGGAACCAGACT     | 1           | 6           |
|                            |   |       |    |              |   |        |    | Jb1.2 (NSDYTFGSGRLLV)                |             |             |
| TGGCTTACCTCTGTGCCCTGGAGTCT |   |       |    | GGGACAGGGGGC |   |        |    | CAAACTCCGACTACACCTTCGGCTCAGGGACCAGG  |             |             |
| TGGCTTACCTCTGTGCCCTGGAGTC  |   | AGGG  |    | AGGGGG       |   | G      |    | AACTCCGACTACACCTTCGGCTCAGGGACCAGG    | 6           | 3           |
|                            |   |       |    |              |   | TGAGAG |    |                                      |             |             |
| TGGCTTACCTCTGTGCCCTGGAG    |   | AGACA |    | GGG          |   | G      |    | ACTCCGACTACACCTTCGGCTCAGGGACCAGG     | 9           | 6           |
| TGGCTTACCTCTGTGCCCT        |   | C     |    | ACAGGGGG     |   | TCTG   |    | ACTCCGACTACACCTTCGGCTCAGGGACCAGG     | 10          | 3           |
| TGGCTTACCTCTGTGCCCT        | A | CCG   | CC | GGGACAGGGGGC | G | GG     |    | TCCGACTACACCTTCGGCTCAGGGACCAGG       | 7           | 5           |
| TGGCTTACCTCTGTGCCCTGGAGTCT |   |       |    | AGGGGG       |   | GAAT   |    | CAAACTCCGACTACACCTTCGGCTCAGGGACCAGG  | 5           | 1           |
| TGGCTTACCTCTGTGCCCTGG      |   | G     | CC | GGG          |   |        |    | ACTCCGACTACACCTTCGGCTCAGGGACCAGG     | 11          | 5           |
| TGGCTTACCTCTGTGCCCTGGAG    |   | GCGA  |    | GGGACAGGG    | C |        |    | CCGACTACACCTTCGGCTCAGGGACCAGG        | 3           | 9           |
| TGGCTTACCTCTGTGCCCTGGAGTCT |   | C     |    | ACAGGG       |   |        |    | AACTCCGACTACACCTTCGGCTCAGGGACCAGG    | 3           | 5           |
| TGGCTTACCTCTGTGCCCTGGAG    | C |       | C  | GA           |   | G      |    | ACTCCGACTACACCTTCGGCTCAGGGACCAGG     | 5           | 11          |
| TGGCTTACCTCTGTGCCCTGGAGTCT |   | GC    |    | CA           |   | CC     | TG | CAAACTCCGACTACACCTTCGGCTCAGGGACCAGG  | 4           | 6           |
| TGGCTTACCTCTGTGCCCTGGAGTCT |   |       |    | AGG          |   | AGA    |    | AAACTCCGACTACACCTTCGGCTCAGGGACCAGG   | 5           | 5           |
| TGGCTTACCTCTGTGCCCTGGAGTC  |   |       | C  | GGACAG       |   |        | TG | CAAACTCCGACTACACCTTCGGCTCAGGGACCAGG  | 2           | 5           |
| TGGCTTACCTCTGTGCCCTGGAGTCT | A | AA    |    | CAGGGG       |   | AGAAGG |    | AACTCCGACTACACCTTCGGCTCAGGGACCAGG    | 4           | 4           |
|                            |   |       |    |              |   |        |    |                                      |             |             |
|                            |   |       |    |              |   |        |    | Average                              | 5.27        | 5.50        |
|                            |   |       |    |              |   |        |    | Stdev                                | 2.85        | 2.56        |





**Supplementary Table 2 Primers used in the study.**

| <b>Primer Name</b>    | <b>Seq 5'-3'</b>              | <b>Note</b>                               |
|-----------------------|-------------------------------|-------------------------------------------|
| c9orf142_DNA_H3F16758 | AGAAGCTTAGAATGCCCAAGTCAGTACAC | 5' ARM                                    |
| c9orf142_DNA_H3R20016 | CAAAGCTTAAAGCGGCAGCGACAA      | 5'ARM                                     |
| C90rf142_DNA_F21421   | CTAGGCCAGACTTGAGTTGTGA        | 3'ARM                                     |
| C90rf142_DNA_R24826   | GAAACGCAGGCCGAGATA            | 3'ARM                                     |
| C9orf142_F24844       | ACAGCAGCAGCCATCTAGG           | 3' probe                                  |
| C9orf142_R25126       | TCCAGGTTCCAAGGATATCAG         | 3' probe                                  |
| mPAXX probe F         | CACGCAAAGGCTCTAGTCC           | mPAXX probe                               |
| mPAXX probe R         | CGGTCTTCTTTCCTATCTATCCC       | mPAXX probe                               |
| C90rf142_DNA_F19601   | ATTGAAGAGCGGCAGATATGT         | Genotype = KO specific (WT=2Kb, KO=0.7kb) |
| C90rf142_DNA_R21583   | ACGCAGAATCAACACAGTAGGT        | Genotype =common                          |
| C9orf142_F20809       | TTGAGTGAGATGCCACGACT          | Genotype =WT specific (WT=0.8Kb)          |
